# Supplementary material for: Body Composition Characteristics of Senior Male Players in the English Premier and Football Leagues: Insights from Dual-Energy X-ray Absorptiometry
Source: Research Square preprint supplement (doi:10.21203/rs.3.rs-7761100/v1), 2025-11-01
Supplement: Supplementary file 1 [file 5c09b4fe39954c1f3ec84a97.docx]

**Supplementary Materials**

**Supplementary Table 1.** Normative anthropometric variables per position.

| **Position** | **Mean** | **Minimum** | **Maximum** | **Prediction Interval**  **(2.5%)** | **Prediction Interval**  **(16%)** | **Prediction Interval**  **(84%)** | **Prediction Interval**  **(97.5%)** |
| --- | --- | --- | --- | --- | --- | --- | --- |
| **Height (cm)** | | | | | | | |
| **GK** | 190 | 181 | 199 | 178 | 184 | 196 | 201 |
| **CD** | 185 | 167 | 196 | 174 | 180 | 192 | 197 |
| **WD** | 179 | 165 | 189 | 167 | 173 | 185 | 190 |
| **CM** | 181 | 167 | 192 | 169 | 175 | 187 | 191 |
| **WM** | 181 | 166 | 194 | 169 | 175 | 186 | 191 |
| **F** | 179 | 171 | 206 | 168 | 174 | 186 | 190 |
| **Body Mass (kg)** | | | | | | | |
| **GK** | 87.6 | 76.3 | 105.5 | 73.9 | 80.7 | 95.6 | 102.5 |
| **CD** | 85.8 | 60.0 | 109.7 | 71.5 | 78.8 | 93.8 | 100.1 |
| **WD** | 76.0 | 62.2 | 96.7 | 62.0 | 69.1 | 83.6 | 91.1 |
| **CM** | 75.1 | 59.8 | 100.2 | 60.5 | 67.8 | 82.5 | 89.9 |
| **WM** | 74.7 | 58.1 | 91.3 | 60.8 | 67.4 | 82.7 | 89.4 |
| **F** | 80.9 | 65.0 | 103.3 | 66.9 | 73.8 | 88.7 | 95.2 |

*GK, goalkeeper; CD, central defender; WD, wide defender; CM, central midfielder; WM, wide midfielder; F, forward.*

| **Position** | **Mean** | **Minimum** | **Maximum** | **Prediction Interval**  **(2.5%)** | **Prediction Interval**  **(16%)** | **Prediction Interval**  **(84%)** | **Prediction Interval**  **(97.5%)** |
| --- | --- | --- | --- | --- | --- | --- | --- |
| **Bone Mass Total (g)** | | | | | | | |
| **GK** | 4222 | 3521 | 5212 | 3323 | 3766 | 4682 | 5074 |
| **CD** | 4164 | 2732 | 5000 | 3258 | 3706 | 4626 | 5049 |
| **WD** | 3527 | 2765 | 4604 | 2637 | 3079 | 3982 | 4413 |
| **CM** | 3753 | 2805 | 5385 | 2864 | 3308 | 4193 | 4597 |
| **WM** | 3625 | 2589 | 4516 | 2738 | 3174 | 4066 | 4495 |
| **F** | 3702 | 2931 | 5533 | 2805 | 3246 | 4148 | 4555 |
| **Bone Mass Total (%)** | | | | | | | |
| **GK** | 4.8 | 4.1 | 6.0 | 4.2 | 4.5 | 5.2 | 5.5 |
| **CD** | 4.7 | 3.7 | 5.5 | 4.2 | 4.4 | 5.1 | 5.4 |
| **WD** | 4.7 | 4.0 | 5.7 | 4.1 | 4.4 | 5.0 | 5.4 |
| **CM** | 4.9 | 4.2 | 5.5 | 4.3 | 4.6 | 5.2 | 5.5 |
| **WM** | 4.8 | 3.9 | 5.8 | 4.2 | 4.5 | 5.1 | 5.4 |
| **F** | 4.7 | 4.1 | 5.7 | 4.1 | 4.4 | 5.0 | 5.4 |
| **Bone Mass Arms (g)** | | | | | | | |
| **GK** | 586 | 490 | 772 | 459 | 524 | 655 | 728 |
| **CD** | 529 | 379 | 678 | 397 | 465 | 599 | 671 |
| **WD** | 489 | 309 | 683 | 355 | 424 | 558 | 631 |
| **CM** | 481 | 334 | 750 | 349 | 415 | 548 | 623 |
| **WM** | 475 | 324 | 674 | 346 | 412 | 546 | 621 |
| **F** | 519 | 366 | 786 | 393 | 451 | 589 | 659 |
| **Bone Mass Legs (g)** | | | | | | | |
| **GK** | 1684 | 1391 | 2163 | 1272 | 1463 | 1887 | 2113 |
| **CD** | 1846 | 1119 | 2161 | 1426 | 1624 | 2062 | 2272 |
| **WD** | 1443 | 1066 | 1917 | 1024 | 1224 | 1657 | 1864 |
| **CM** | 1487 | 1140 | 2212 | 1074 | 1270 | 1692 | 1921 |
| **WM** | 1456 | 1061 | 1887 | 1048 | 1235 | 1668 | 1888 |
| **F** | 1506 | 1157 | 2402 | 1102 | 1285 | 1719 | 1940 |
| **Bone Mass Trunk (g)** | | | | | | | |
| **GK** | 1345 | 1099 | 1661 | 1039 | 1204 | 1485 | 1633 |
| **CD** | 1215 | 811 | 1570 | 911 | 1076 | 1353 | 1496 |
| **WD** | 1054 | 806 | 1512 | 759 | 913 | 1201 | 1340 |
| **CM** | 1152 | 800 | 1734 | 842 | 1005 | 1294 | 1428 |
| **WM** | 1085 | 720 | 1523 | 779 | 939 | 1228 | 1366 |
| **F** | 1125 | 843 | 1710 | 837 | 984 | 1271 | 1407 |

**Supplementary Table 2.** Normative bone mass values per position.

*GK, goalkeeper; CD, central defender; WD, wide defender; CM, central midfielder; WM, wide midfielder; F, forward.*

**Supplementary Table 3.** Normative bone mineral content values per position.

| **Position** | **Mean** | **Minimum** | **Maximum** | **Prediction Interval**  **(2.5%)** | **Prediction Interval**  **(16%)** | **Prediction Interval**  **(84%)** | **Prediction Interval**  **(97.5%)** |
| --- | --- | --- | --- | --- | --- | --- | --- |
| **Bone Mineral Content Total (g)** | | | | | | | |
| **GK** | 3674 | 2811 | 5194 | 2862 | 3243 | 4174 | 4730 |
| **CD** | 3785 | 2589 | 5212 | 2954 | 3331 | 4308 | 4917 |
| **WD** | 3788 | 2805 | 5067 | 2932 | 3330 | 4292 | 4802 |
| **CM** | 3864 | 2646 | 5533 | 3016 | 3418 | 4362 | 4918 |
| **WM** | 3775 | 2596 | 5385 | 2991 | 3340 | 4251 | 4820 |
| **F** | 3816 | 2732 | 4783 | 2981 | 3358 | 4258 | 4717 |
| **Bone Mineral Content Arms (g)** | | | | | | | |
| **GK** | 482 | 334 | 746 | 347 | 415 | 557 | 636 |
| **CD** | 507 | 324 | 733 | 385 | 439 | 581 | 681 |
| **WD** | 498 | 338 | 764 | 372 | 435 | 578 | 663 |
| **CM** | 512 | 327 | 786 | 387 | 447 | 591 | 681 |
| **WM** | 501 | 309 | 772 | 371 | 430 | 576 | 663 |
| **F** | 500 | 379 | 670 | 375 | 437 | 580 | 660 |
| **Bone Mineral Content Legs (g)** | | | | | | | |
| **GK** | 1509 | 1101 | 2163 | 1152 | 1308 | 1712 | 1952 |
| **CD** | 1535 | 1068 | 2147 | 1209 | 1351 | 1769 | 1995 |
| **WD** | 1532 | 1076 | 2165 | 1175 | 1352 | 1746 | 1991 |
| **CM** | 1577 | 1069 | 2402 | 1197 | 1382 | 1780 | 2033 |
| **WM** | 1536 | 1061 | 2212 | 1180 | 1349 | 1731 | 1970 |
| **F** | 1536 | 1101 | 2004 | 1184 | 1341 | 1771 | 2013 |
| **Bone Mineral Content Trunk (g)** | | | | | | | |
| **GK** | 1133 | 795 | 1608 | 852 | 974 | 1303 | 1501 |
| **CD** | 1155 | 759 | 1652 | 872 | 1000 | 1337 | 1562 |
| **WD** | 1143 | 783 | 1616 | 868 | 996 | 1309 | 1498 |
| **CM** | 1176 | 764 | 1710 | 882 | 1028 | 1366 | 1565 |
| **WM** | 1134 | 761 | 1734 | 862 | 988 | 1316 | 1523 |
| **F** | 1137 | 720 | 1612 | 844 | 987 | 1315 | 1498 |
| **Bone Mineral Content Head (g)** | | | | | | | |
| **GK** | 556 | 404 | 775 | 430 | 480 | 636 | 732 |
| **CD** | 578 | 423 | 835 | 438 | 500 | 664 | 766 |
| **WD** | 579 | 401 | 783 | 447 | 506 | 665 | 777 |
| **CM** | 583 | 419 | 832 | 447 | 507 | 668 | 783 |
| **WM** | 564 | 441 | 830 | 435 | 495 | 649 | 733 |
| **F** | 583 | 397 | 816 | 442 | 508 | 671 | 776 |
| **Bone Mineral Content Spine (g)** | | | | | | | |
| **GK** | 242 | 164 | 328 | 180 | 206 | 283 | 330 |
| **CD** | 253 | 147 | 339 | 190 | 217 | 299 | 345 |
| **WD** | 252 | 165 | 358 | 186 | 212 | 296 | 345 |
| **CM** | 255 | 146 | 358 | 190 | 220 | 301 | 346 |
| **WM** | 247 | 132 | 388 | 177 | 212 | 288 | 346 |
| **F** | 255 | 156 | 348 | 187 | 218 | 300 | 353 |
| **Bone Mineral Content Pelvis (g)** | | | | | | | |
| **GK** | 550 | 389 | 760 | 426 | 480 | 638 | 746 |
| **CD** | 575 | 399 | 759 | 423 | 488 | 671 | 763 |
| **WD** | 572 | 390 | 821 | 421 | 484 | 665 | 760 |
| **CM** | 577 | 273 | 888 | 434 | 499 | 667 | 796 |
| **WM** | 560 | 385 | 843 | 418 | 482 | 651 | 756 |
| **F** | 562 | 238 | 778 | 425 | 484 | 655 | 753 |

*GK, goalkeeper; CD, central defender; WD, wide defender; CM, central midfielder; WM, wide midfielder; F, forward.*

**Supplementary Table 4.** Normative bone mineral density values per position.

| **Position** | **Mean** | **Minimum** | **Maximum** | **Prediction Interval**  **(2.5%)** | **Prediction Interval**  **(16%)** | **Prediction Interval**  **(84%)** | **Prediction Interval**  **(97.5%)** |
| --- | --- | --- | --- | --- | --- | --- | --- |
| **Bone Mineral Density Total (g/cm2)** | | | | | | | |
| **GK** | 1.45 | 1.25 | 1.78 | 1.22 | 1.33 | 1.57 | 1.68 |
| **CD** | 1.49 | 1.16 | 1.76 | 1.27 | 1.37 | 1.60 | 1.71 |
| **WD** | 1.48 | 1.23 | 1.70 | 1.26 | 1.37 | 1.59 | 1.72 |
| **CM** | 1.49 | 1.17 | 1.86 | 1.27 | 1.38 | 1.61 | 1.73 |
| **WM** | 1.47 | 1.15 | 1.87 | 1.26 | 1.36 | 1.59 | 1.72 |
| **F** | 1.48 | 1.27 | 1.70 | 1.25 | 1.37 | 1.60 | 1.70 |
| **Bone Mineral Density Arms (g/cm2)** | | | | | | | |
| **GK** | 1.05 | 0.81 | 1.40 | 0.84 | 0.94 | 1.15 | 1.25 |
| **CD** | 1.07 | 0.80 | 1.34 | 0.85 | 0.96 | 1.18 | 1.29 |
| **WD** | 1.06 | 0.83 | 1.36 | 0.86 | 0.96 | 1.18 | 1.29 |
| **CM** | 1.08 | 0.75 | 1.36 | 0.88 | 0.97 | 1.19 | 1.29 |
| **WM** | 1.04 | 0.70 | 1.36 | 0.83 | 0.94 | 1.16 | 1.27 |
| **F** | 1.05 | 0.81 | 1.30 | 0.86 | 0.95 | 1.17 | 1.28 |
| **Bone Mineral Density Legs (g/cm2)** | | | | | | | |
| **GK** | 1.61 | 1.37 | 2.00 | 1.35 | 1.48 | 1.75 | 1.87 |
| **CD** | 1.66 | 1.30 | 2.01 | 1.38 | 1.52 | 1.79 | 1.92 |
| **WD** | 1.66 | 1.33 | 2.00 | 1.39 | 1.52 | 1.79 | 1.92 |
| **CM** | 1.67 | 1.33 | 2.12 | 1.41 | 1.52 | 1.81 | 1.94 |
| **WM** | 1.65 | 1.31 | 2.12 | 1.39 | 1.52 | 1.78 | 1.90 |
| **F** | 1.64 | 1.38 | 1.95 | 1.39 | 1.51 | 1.79 | 1.90 |
| **Bone Mineral Density Trunk (g/cm2)** | | | | | | | |
| **GK** | 1.27 | 1.04 | 1.60 | 1.05 | 1.16 | 1.38 | 1.47 |
| **CD** | 1.29 | 1.00 | 1.58 | 1.07 | 1.19 | 1.40 | 1.50 |
| **WD** | 1.29 | 1.03 | 1.57 | 1.08 | 1.20 | 1.40 | 1.51 |
| **CM** | 1.30 | 1.01 | 1.70 | 1.09 | 1.19 | 1.41 | 1.51 |
| **WM** | 1.28 | 1.02 | 1.72 | 1.07 | 1.18 | 1.38 | 1.48 |
| **F** | 1.30 | 1.07 | 1.56 | 1.08 | 1.19 | 1.41 | 1.51 |
| **Bone Mineral Density Head (g/cm2)** | | | | | | | |
| **GK** | 2.29 | 1.81 | 3.10 | 1.85 | 2.05 | 2.56 | 2.87 |
| **CD** | 2.39 | 1.72 | 3.08 | 1.86 | 2.13 | 2.69 | 2.99 |
| **WD** | 2.38 | 1.68 | 3.07 | 1.90 | 2.10 | 2.67 | 2.96 |
| **CM** | 2.39 | 1.80 | 3.05 | 1.91 | 2.14 | 2.68 | 2.99 |
| **WM** | 2.34 | 1.82 | 3.05 | 1.89 | 2.11 | 2.62 | 2.96 |
| **F** | 2.43 | 1.81 | 3.10 | 1.96 | 2.16 | 2.74 | 3.05 |
| **Bone Mineral Density Spine (g/cm2)** | | | | | | | |
| **GK** | 1.30 | 1.02 | 1.67 | 1.04 | 1.17 | 1.43 | 1.57 |
| **CD** | 1.34 | 0.97 | 1.65 | 1.07 | 1.21 | 1.47 | 1.58 |
| **WD** | 1.34 | 1.06 | 1.65 | 1.08 | 1.22 | 1.48 | 1.59 |
| **CM** | 1.36 | 0.98 | 1.78 | 1.12 | 1.23 | 1.48 | 1.60 |
| **WM** | 1.33 | 0.95 | 1.77 | 1.09 | 1.19 | 1.46 | 1.56 |
| **F** | 1.36 | 1.02 | 1.63 | 1.11 | 1.23 | 1.48 | 1.60 |
| **Bone Mineral Density Pelvis (g/cm2)** | | | | | | | |
| **GK** | 1.47 | 1.19 | 1.97 | 1.19 | 1.33 | 1.62 | 1.74 |
| **CD** | 1.49 | 1.13 | 1.97 | 1.22 | 1.36 | 1.64 | 1.78 |
| **WD** | 1.51 | 1.15 | 1.82 | 1.22 | 1.37 | 1.65 | 1.81 |
| **CM** | 1.51 | 1.16 | 2.11 | 1.20 | 1.36 | 1.64 | 1.81 |
| **WM** | 1.46 | 1.15 | 2.00 | 1.17 | 1.32 | 1.62 | 1.75 |
| **F** | 1.50 | 1.16 | 1.91 | 1.21 | 1.35 | 1.64 | 1.80 |

*GK, goalkeeper; CD, central defender; WD, wide defender; CM, central midfielder; WM, wide midfielder; F, forward.*

**Supplementary Table 5.** Normative fat-free mass values per position.

| **Position** | **Mean** | **Minimum** | **Maximum** | **Prediction Interval**  **(2.5%)** | **Prediction Interval**  **(16%)** | **Prediction Interval**  **(84%)** | **Prediction Interval**  **(97.5%)** |
| --- | --- | --- | --- | --- | --- | --- | --- |
| **Fat-Free Mass Total (kg)** | | | | | | | |
| **GK** | 73.9 | 63.0 | 86.2 | 61.7 | 67.3 | 80.9 | 89.0 |
| **CD** | 73.8 | 54.0 | 86.5 | 61.8 | 67.0 | 80.8 | 89.8 |
| **WD** | 66.9 | 53.0 | 81.4 | 56.0 | 60.9 | 73.4 | 81.0 |
| **CM** | 65.2 | 53.3 | 83.5 | 54.2 | 58.8 | 71.3 | 78.5 |
| **WM** | 65.4 | 48.7 | 81.7 | 54.3 | 59.1 | 71.4 | 79.3 |
| **F** | 69.5 | 56.1 | 93.2 | 58.5 | 63.4 | 76.7 | 84.4 |
| **Fat-Free Mass Total (%)** | | | | | | | |
| **GK** | 84.5 | 78.0 | 91.0 | 76.9 | 81.0 | 87.4 | 89.4 |
| **CD** | 86.8 | 76.8 | 92.3 | 80.9 | 83.8 | 89.3 | 91.4 |
| **WD** | 87.8 | 79.4 | 93.5 | 81.9 | 85.0 | 90.3 | 92.0 |
| **CM** | 87.3 | 79.9 | 92.5 | 80.7 | 84.4 | 89.5 | 91.5 |
| **WM** | 87.8 | 80.7 | 92.8 | 81.9 | 85.1 | 90.1 | 92.0 |
| **F** | 86.7 | 78.4 | 91.4 | 80.0 | 83.5 | 89.0 | 90.9 |
| **Fat-Free Mass Arms (kg)** | | | | | | | |
| **GK** | 9.7 | 8.0 | 12.2 | 7.8 | 8.6 | 10.9 | 12.3 |
| **CD** | 9.3 | 6.5 | 11.4 | 7.3 | 8.2 | 10.4 | 11.9 |
| **WD** | 8.4 | 6.0 | 11.9 | 6.7 | 7.5 | 9.5 | 10.7 |
| **CM** | 8.3 | 6.5 | 11.4 | 6.5 | 7.3 | 9.3 | 10.4 |
| **WM** | 8.3 | 5.7 | 11.6 | 6.6 | 7.4 | 9.3 | 10.4 |
| **F** | 9.0 | 6.7 | 12.4 | 7.2 | 8.0 | 10.2 | 11.3 |
| **Fat-Free Mass Legs (kg)** | | | | | | | |
| **GK** | 25.5 | 20.9 | 32.0 | 20.7 | 22.9 | 28.8 | 32.0 |
| **CD** | 26.5 | 18.7 | 33.9 | 21.3 | 23.8 | 30.0 | 33.0 |
| **WD** | 23.6 | 17.9 | 29.3 | 19.0 | 21.1 | 26.5 | 29.4 |
| **CM** | 22.5 | 18.4 | 30.4 | 18.2 | 20.1 | 25.4 | 28.2 |
| **WM** | 22.8 | 17.2 | 29.1 | 18.4 | 20.4 | 25.6 | 28.5 |
| **F** | 24.8 | 19.7 | 34.8 | 20.0 | 22.2 | 28.0 | 31.1 |
| **Fat-Free Mass Trunk (kg)** | | | | | | | |
| **GK** | 34.2 | 20.9 | 32.0 | 28.6 | 31.2 | 37.4 | 41.0 |
| **CD** | 33.3 | 18.7 | 33.9 | 27.8 | 30.4 | 36.6 | 39.7 |
| **WD** | 30.8 | 17.9 | 29.3 | 25.6 | 27.9 | 33.7 | 36.6 |
| **CM** | 30.1 | 18.4 | 30.4 | 25.3 | 27.7 | 33.2 | 35.7 |
| **WM** | 30.0 | 17.2 | 29.1 | 25.3 | 27.3 | 33.0 | 35.5 |
| **F** | 32.0 | 19.7 | 34.8 | 26.4 | 29.2 | 35.1 | 37.8 |

*GK, goalkeeper; CD, central defender; WD, wide defender; CM, central midfielder; WM, wide midfielder; F, forward.*

**Supplementary Table 6.** Normative lean mass values per position.

| **Position** | **Mean** | **Minimum** | **Maximum** | **Prediction Interval**  **(2.5%)** | **Prediction Interval**  **(16%)** | **Prediction Interval**  **(84%)** | **Prediction Interval**  **(97.5%)** |
| --- | --- | --- | --- | --- | --- | --- | --- |
| **Lean Mass Total (kg)** | | | | | | | |
| **GK** | 69.5 | 59.1 | 81.7 | 57.8 | 63.2 | 76.0 | 83.5 |
| **CD** | 69.6 | 51.2 | 81.8 | 57.8 | 63.4 | 76.2 | 83.9 |
| **WD** | 63.5 | 49.9 | 76.8 | 52.7 | 57.4 | 69.3 | 76.6 |
| **CM** | 61.2 | 50.2 | 78.1 | 50.8 | 55.8 | 67.2 | 73.5 |
| **WM** | 61.5 | 46.1 | 77.3 | 51.1 | 56.0 | 67.3 | 74.4 |
| **F** | 65.8 | 53.2 | 88.8 | 54.6 | 59.8 | 72.0 | 79.6 |
| **Lean Mass Total (%)** | | | | | | | |
| **GK** | 79.6 | 73.5 | 85.8 | 73.1 | 76.5 | 82.4 | 84.4 |
| **CD** | 82.0 | 73.1 | 87.4 | 76.5 | 79.2 | 84.6 | 86.4 |
| **WD** | 82.9 | 74.8 | 88.8 | 77.9 | 80.6 | 85.4 | 87.5 |
| **CM** | 82.4 | 75.1 | 87.3 | 76.9 | 79.9 | 84.8 | 87.0 |
| **WM** | 82.9 | 76.5 | 88.1 | 77.5 | 80.4 | 85.2 | 87.3 |
| **F** | 82.0 | 74.2 | 86.8 | 76.1 | 79.0 | 84.5 | 86.4 |
| **Lean Mass Arms (kg)** | | | | | | | |
| **GK** | 9.1 | 7.5 | 11.4 | 7.3 | 8.1 | 10.3 | 11.6 |
| **CD** | 8.7 | 6.1 | 10.8 | 6.9 | 7.7 | 9.8 | 11.1 |
| **WD** | 7.9 | 5.7 | 11.2 | 6.2 | 7.0 | 8.9 | 10.0 |
| **CM** | 7.7 | 6.2 | 10.8 | 6.1 | 6.8 | 8.7 | 9.9 |
| **WM** | 7.7 | 5.3 | 11.0 | 6.2 | 6.9 | 8.8 | 9.9 |
| **F** | 8.4 | 6.4 | 11.7 | 6.7 | 7.5 | 9.6 | 10.6 |
| **Lean Mass Legs (kg)** | | | | | | | |
| **GK** | 23.7 | 19.5 | 30.0 | 18.9 | 21.2 | 26.8 | 30.3 |
| **CD** | 24.7 | 17.6 | 31.9 | 19.6 | 22.0 | 27.9 | 31.5 |
| **WD** | 22.2 | 16.8 | 27.4 | 17.7 | 19.8 | 24.8 | 28.4 |
| **CM** | 21.0 | 17.1 | 28.7 | 16.7 | 18.8 | 23.6 | 26.8 |
| **WM** | 21.3 | 16.2 | 27.2 | 17.1 | 19.1 | 24.0 | 27.3 |
| **F** | 23.2 | 18.5 | 33.1 | 18.5 | 20.8 | 26.1 | 29.5 |
| **Lean Mass Trunk (kg)** | | | | | | | |
| **GK** | 23.9 | 19.5 | 30.0 | 19.0 | 21.4 | 26.9 | 29.9 |
| **CD** | 24.9 | 17.6 | 31.9 | 19.4 | 22.3 | 28.0 | 31.2 |
| **WD** | 22.3 | 16.8 | 27.4 | 17.4 | 19.9 | 25.0 | 27.6 |
| **CM** | 21.2 | 17.1 | 28.7 | 16.5 | 19.0 | 23.7 | 26.3 |
| **WM** | 21.5 | 16.2 | 27.2 | 16.8 | 19.2 | 24.0 | 26.7 |
| **F** | 23.3 | 18.5 | 33.1 | 18.2 | 20.8 | 26.1 | 28.8 |

*GK, goalkeeper; CD, central defender; WD, wide defender; CM, central midfielder; WM, wide midfielder; F, forward.*

**Supplementary Table 7.** Normative fat mass values per position.

| **Position** | **Mean** | **Minimum** | **Maximum** | **Prediction Interval**  **(2.5%)** | **Prediction Interval**  **(16%)** | **Prediction Interval**  **(84%)** | **Prediction Interval**  **(97.5%)** |
| --- | --- | --- | --- | --- | --- | --- | --- |
| **Fat Mass Total (kg)** | | | | | | | |
| **GK** | 13.5 | 7.1 | 21.9 | 8.0 | 10.6 | 17.5 | 22.7 |
| **CD** | 10.8 | 6.1 | 25.4 | 6.7 | 8.6 | 13.9 | 18.0 |
| **WD** | 9.1 | 5.3 | 18.9 | 5.6 | 7.0 | 11.7 | 14.5 |
| **CM** | 9.6 | 5.7 | 19.4 | 5.8 | 7.5 | 12.2 | 15.3 |
| **WM** | 9.1 | 5.0 | 15.9 | 5.6 | 7.0 | 11.5 | 14.9 |
| **F** | 10.6 | 6.9 | 18.9 | 6.5 | 8.3 | 13.8 | 17.4 |
| **Fat Mass Total (%)** | | | | | | | |
| **GK** | 15.4 | 9.0 | 22.0 | 10.5 | 12.7 | 18.9 | 22.8 |
| **CD** | 13.1 | 7.7 | 23.2 | 8.7 | 10.7 | 16.1 | 19.3 |
| **WD** | 12.1 | 6.5 | 20.6 | 8.0 | 9.9 | 14.8 | 18.0 |
| **CM** | 12.7 | 7.5 | 20.1 | 8.5 | 10.3 | 15.6 | 19.1 |
| **WM** | 12.4 | 7.2 | 19.3 | 8.2 | 10.1 | 15.0 | 18.2 |
| **F** | 13.3 | 8.6 | 21.6 | 9.0 | 10.9 | 16.4 | 20.0 |
| **Fat Mass Arms (kg)** | | | | | | | |
| **GK** | 1.4 | 0.9 | 2.3 | 0.9 | 1.2 | 1.8 | 2.3 |
| **CD** | 1.2 | 0.7 | 2.5 | 0.7 | 1.0 | 1.5 | 2.0 |
| **WD** | 1.0 | 0.6 | 1.9 | 0.7 | 0.8 | 1.3 | 1.6 |
| **CM** | 1.0 | 0.6 | 1.8 | 0.7 | 0.8 | 1.3 | 1.6 |
| **WM** | 1.0 | 0.6 | 1.9 | 0.6 | 0.8 | 1.3 | 1.6 |
| **F** | 1.2 | 0.7 | 2.1 | 0.7 | 0.9 | 1.5 | 1.9 |
| **Fat Mass Legs (kg)** | | | | | | | |
| **GK** | 4.9 | 2.2 | 8.9 | 3.0 | 3.7 | 6.4 | 8.2 |
| **CD** | 4.0 | 2.0 | 7.6 | 2.4 | 3.1 | 5.2 | 6.9 |
| **WD** | 3.3 | 1.7 | 6.1 | 2.0 | 2.5 | 4.2 | 5.5 |
| **CM** | 3.6 | 2.0 | 6.4 | 2.1 | 2.7 | 4.6 | 5.9 |
| **WM** | 3.3 | 1.9 | 6.4 | 2.0 | 2.5 | 4.3 | 5.6 |
| **F** | 3.9 | 2.3 | 7.9 | 2.4 | 3.0 | 5.0 | 6.5 |
| **Fat Mass Trunk (kg)** | | | | | | | |
| **GK** | 6.2 | 2.8 | 11.9 | 3.1 | 4.4 | 8.5 | 11.8 |
| **CD** | 4.8 | 1.8 | 14.5 | 2.5 | 3.4 | 6.7 | 9.0 |
| **WD** | 3.9 | 1.9 | 11.3 | 2.0 | 2.7 | 5.5 | 7.3 |
| **CM** | 4.0 | 1.9 | 10.2 | 2.1 | 2.9 | 5.6 | 7.6 |
| **WM** | 3.8 | 1.7 | 8.7 | 2.0 | 2.7 | 5.3 | 7.3 |
| **F** | 4.8 | 2.5 | 9.7 | 2.5 | 3.3 | 6.6 | 9.2 |

*GK, goalkeeper; CD, central defender; WD, wide defender; CM, central midfielder; WM, wide midfielder; F, forward.*
